# Supplementary material
Source: PubMed Central journal article supplement (PMC4907152)
Supplement: IAI.00130-16_zii999091724so1.pdf [file IAI.00130-16_zii999091724so1.pdf]

## Supplemental Materials

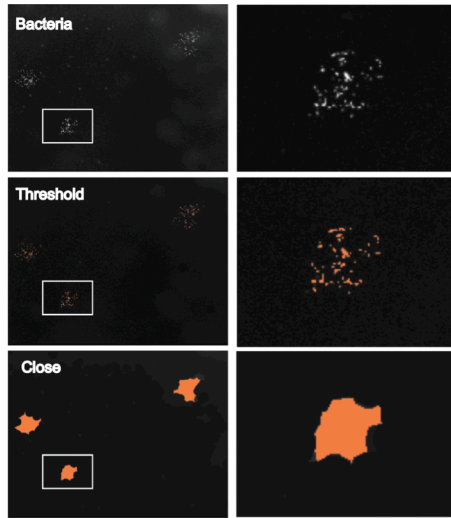

**Fig. S1. Computer-assisted image analysis.**

Representative images of HeLa 229 cells infected with GFP-expressing *L. monocytogenes* for 8 hours (Top panels, Bacteria). The high intensity pixels corresponding to the bacteria were selected against the low intensity pixels corresponding to background by using the threshold function of the MetaMorph 7.1 imaging software (Middle panels, Threshold). Selected pixels were clustered by proximity using the “close” morphological filter in order to create single objects that represent infection foci (Bottom panels, Close). The integrated morphometry analysis (IMA) module was used to determine the size of the identified foci in a given image and their corresponding total gray intensities (total GFP signal), as shown in Figure 1B and 1C, respectively. The right panels show zoomed-in images corresponding to the boxed area of the images in the left panels.

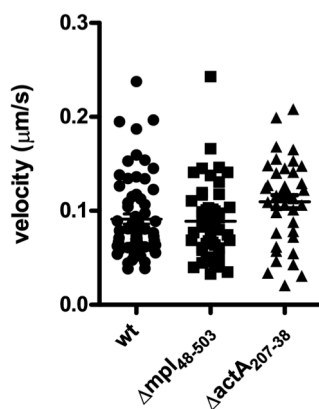

**Fig. S2.** Graph showing cytosolic motility recorded in cells

infected with wild type, the *mpl* or the *actA*<sub>207-238</sub> mutants.

Cytosolic velocity of wild type (wt, n=65), *mpl* mutant ( $\Delta mpl_{48-503}$ , n=49), and *actA* mutant ( $\Delta actA_{207-38}$ , n=40) in HeLa229 cells.

Data were analyzed by one-way ANOVA using PRISM 5

(GraphPad Software). wt vs.  $\Delta mpl_{48-503}$ , ns; wt vs.  $\Delta actA_{207-38}$ , ns;

$\Delta mpl_{48-503}$  vs.  $\Delta actA_{207-38}$ , ns.

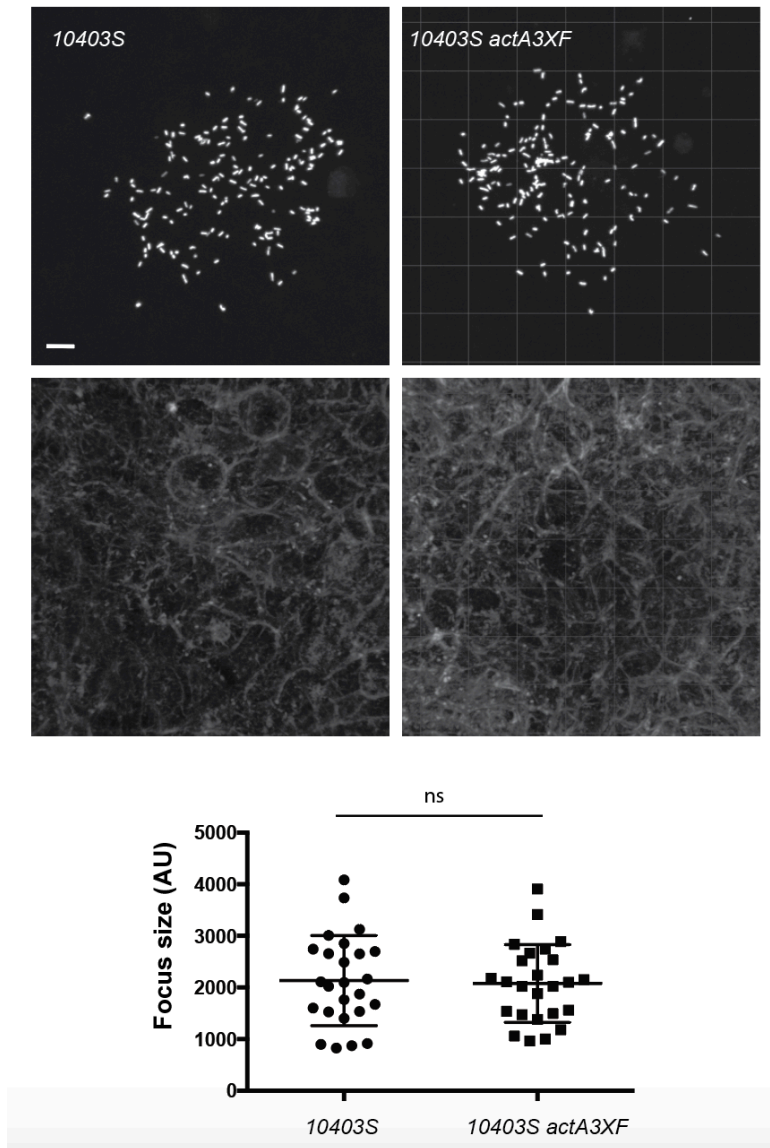

**Fig. S3.** Characterization of the infection foci formed in cells infected with wild type (10403S) and 3xFlag ActA (10403S *actA3xF*) bacteria. (A) Representative images showing monolayers of confluent HeLa-229 cells infected with GFP-expressing *L. monocytogenes* for 6 h (top, GFP-expressing bacteria; bottom, Phalloidin staining). Scale bar represents 10  $\mu$ m. (B) Graph showing the size of the infection foci as determined by computer-assisted analysis of images as shown in (A). 10403S *actA3xF* vs. 10403S, n.s.; unpaired t-test.

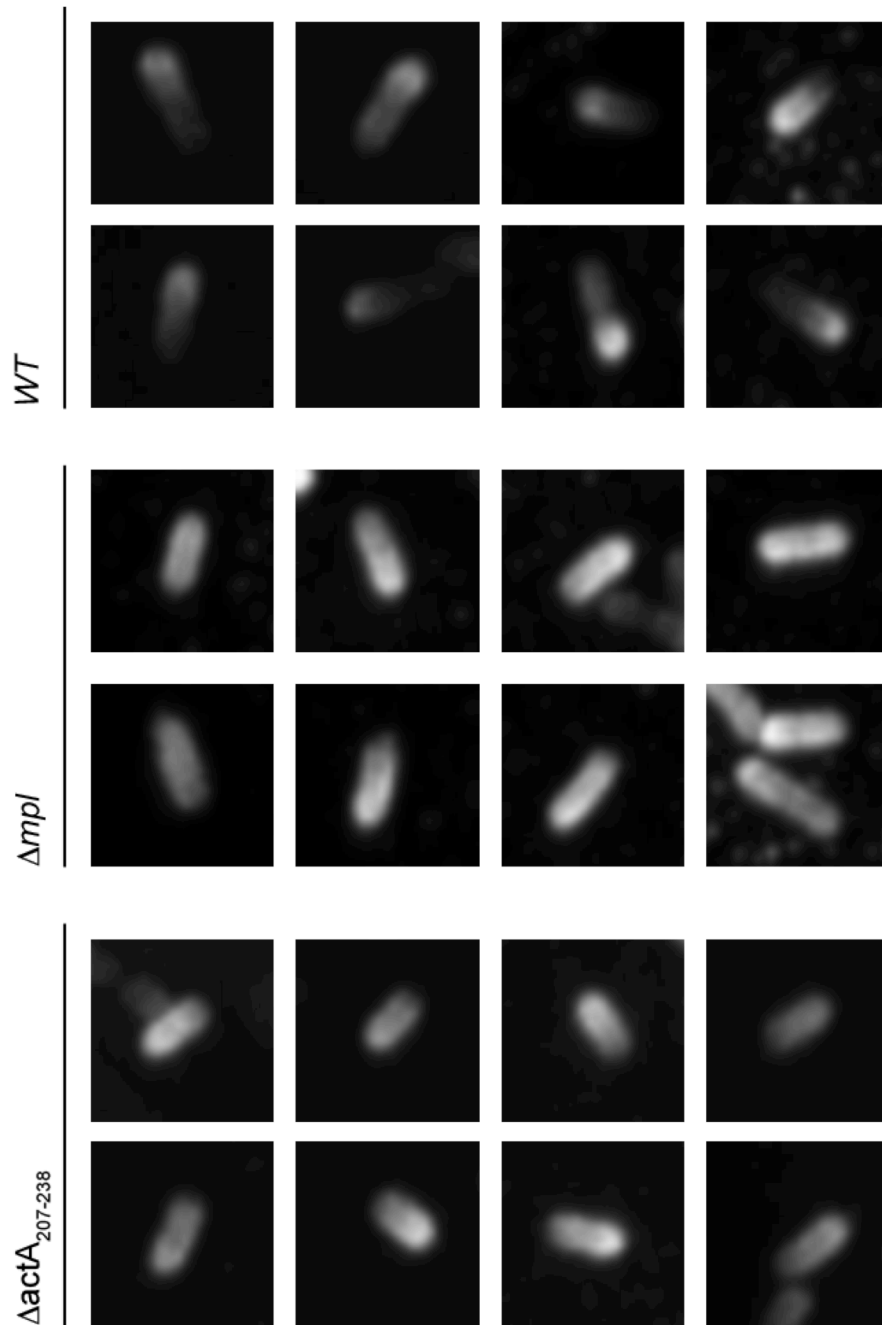

**Fig. S4.** Distribution of ActA on the surface of wt, *mpl* and  $\Delta actA_{207-38}$  mutant bacteria forming protrusions. Gallery of images showing the distribution of 3xFlag-ActA on the surface of bacteria in protrusions.

**Table S1.** Primers used in this study

| Primer Name             | Sequence (5'-3')                                                        |
|-------------------------|-------------------------------------------------------------------------|
| ActAEco                 | GAAGAATTCGAAGCAGTTGGGGTTAA                                              |
| ActA3BamHI              | GGAGGATCCCACCTTATCAGAGCCGGCGCGC                                         |
| 3xFsense                | ATTATAAAGATCATGACATCGATTACAAGGATGACGATAAGATCTTAAATC<br>AAAAACCATTTTTCCC |
| 3xFantisense            | GATGTCATGATCTTTATAATCACCGTCATGGTCTTTGTAGTCCATGGCTTTTA<br>AAGGTTGTGG     |
| $\Delta$ 207-38 sense   | GACATCGATTACAAGGATGACGATGCGATTGTTGATAAAAAGTGC                           |
| pMplEco                 | GAAGAATTCGTTTTGCACCTTCGTAA                                              |
| mpl HP BglIII antisense | GAAGATCTATCCACCCGCTAACGAGTGGATAAGAATGTATTCCTCAGTTAAC<br>CCCAAC          |

**Table S2.** Bacterial strains and relevant characteristics

| Strain <sup>a</sup> | Relevant characteristic(s)                                               | Reference or source |
|---------------------|--------------------------------------------------------------------------|---------------------|
| 10403S              | Wild type                                                                | (1)                 |
| L37                 | $\Delta$ <i>mpl</i> <sub>48-503</sub> <sup>b</sup>                       | This work           |
| DP-L1935            | $\Delta$ <i>plcB</i>                                                     | (2)                 |
| L35                 | 3xFlag <i>actA</i> <sup>c</sup>                                          | This work           |
| L71                 | $\Delta$ <i>mpl</i> <sub>48-503</sub> -3xFlag <i>actA</i> <sup>b,c</sup> | This work           |
| L156                | 3xFlag $\Delta$ <i>actA</i> <sub>207-238</sub> <sup>c,d</sup>            | This work           |
| DP-L3078            | $\Delta$ <i>actA</i>                                                     | (3)                 |

<sup>a</sup> All strains were derived from *L. monocytogenes* 10403S

<sup>b</sup> In frame deletion of *mpl*

<sup>c</sup> 3xFlag was inserted at amino acid 200 of ActA

<sup>d</sup> In frame deletion of *actA*

**Table S3.** Plasmids and relevant characteristics

| <b>Plasmid</b>                                                     | <b>Relevant characteristic(s)</b>                                                                   |
|--------------------------------------------------------------------|-----------------------------------------------------------------------------------------------------|
| p304 <i>mpl-actA-plcB</i>                                          | pHT304 (4) containing <i>mpl-actA-plcB</i> full-length operon                                       |
| p304 $\Delta$ <i>mpl</i> <sub>48-503</sub> - <i>actA-plcB</i>      | p304 <i>mpl-actA-plcB</i> carrying an in frame deletion of <i>mpl</i>                               |
| p304 <i>mpl-3xF actA</i> $\Delta$ <sub>207-238</sub> - <i>plcB</i> | p304 <i>mpl-actA-plcB</i> carrying 3xFlag insertion at amino acid 200 and in frame deletion of ActA |
| pMAD $\Delta$ <i>mpl</i> <sub>48-503</sub>                         | pMAD (5) containing in frame deletion of <i>mpl</i>                                                 |
| pMAD-3xFlagActA                                                    | pMAD (5) containing <i>actA</i> with 3xFlag insertion at amino acid 200                             |
| pMAD-3xFlag <i>actA</i> $\Delta$ <sub>207-238</sub>                | pMAD (5) containing in frame deletion of <i>actA</i> with 3xFlag insertion at amino acid 200        |
| p315hspkGFP                                                        | pHT315 (4) GFP under the control of a IPTG-inducible promoter                                       |
| p304 <i>mpl</i>                                                    | pHT304 (4) containing <i>mpl</i> promoter and ORF followed by <i>plcB</i> terminator                |
| pDsRed-Monomer-Mem                                                 | N-terminal 20 amino acids of neuromodulin and monomeric RFP                                         |

**References**

1. **Bishop DK, Hinrichs DJ.** 1987. Adoptive transfer of immunity to *Listeria monocytogenes*. The influence of in vitro stimulation on lymphocyte subset requirements. *J Immunol* **139**:2005-2009.
2. **Smith GA, Marquis H, Jones S, Johnston NC, Portnoy DA, Goldfine H.** 1995. The two distinct phospholipases C of *Listeria monocytogenes* have overlapping roles in escape from a vacuole and cell-to-cell spread. *Infect Immun* **63**:4231-4237.
3. **Skoble J, Portnoy DA, Welch MD.** 2000. Three regions within ActA promote Arp2/3 complex-mediated actin nucleation and *Listeria monocytogenes* motility. *J Cell Biol* **150**:527-538.
4. **Arantes O, Lereclus D.** 1991. Construction of cloning vectors for *Bacillus thuringiensis*. *Gene* **108**:115-119.
5. **Arnaud M, Chastanet A, Debarbouille M.** 2004. New vector for efficient allelic replacement in naturally nontransformable, low-GC-content, gram-positive bacteria. *Appl Environ Microbiol* **70**:6887-6891.
